# Supplementary material for: Photocatalytic secondary amine synthesis from azobenzenes and alcohols on TiO2 loaded with Pd nanoparticles
Source: Royal Society of Chemistry journal article supplement (doi:10.1039/c5nj00158g), 2015-01-01
Supplement: c5nj00158g1.pdf [file c5nj00158g1.pdf]

## Photocatalytic secondary amine synthesis from azobenzenes and alcohols by TiO<sub>2</sub> loaded with Pd nanoparticles

Kaliyamoorthy Selvam,<sup>a</sup> Hirokatsu Sakamoto,<sup>a</sup> Yasuhiro Shiraishi,<sup>\*a,b</sup> and Takayuki Hirai<sup>a</sup>

<sup>a</sup> *Research Center for Solar Energy Chemistry, and Division of Chemical Engineering,  
Graduate School of Engineering Science, Osaka University, Toyonaka 560-8531, Japan*

<sup>b</sup> *PRESTO, JST, Saitama 332-0012, Japan*

*E-mail: shiraish@cheng.es.osaka-u.ac.jp*

### Electronic Supplementary Information (ESI†)

**Pd<sub>0.5</sub>/TiO<sub>2</sub>**

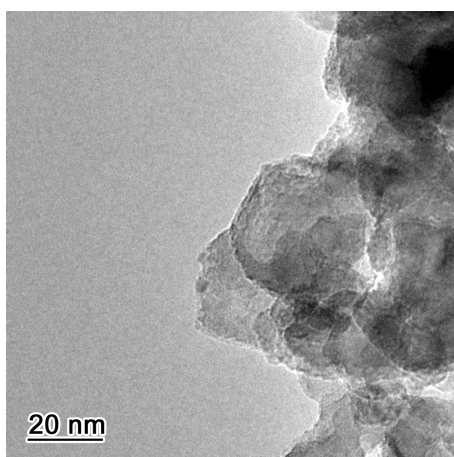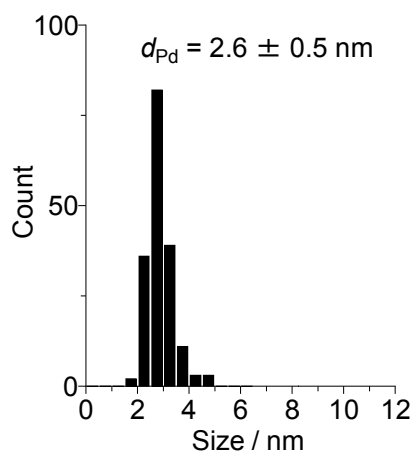

**Pd<sub>1</sub>/TiO<sub>2</sub>**

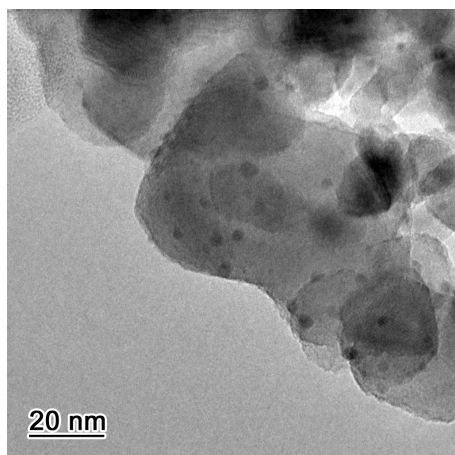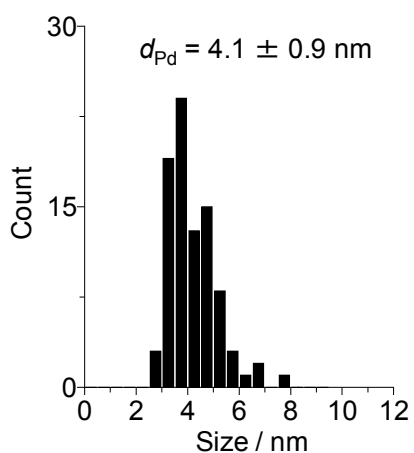

**Pd<sub>2</sub>/TiO<sub>2</sub>**

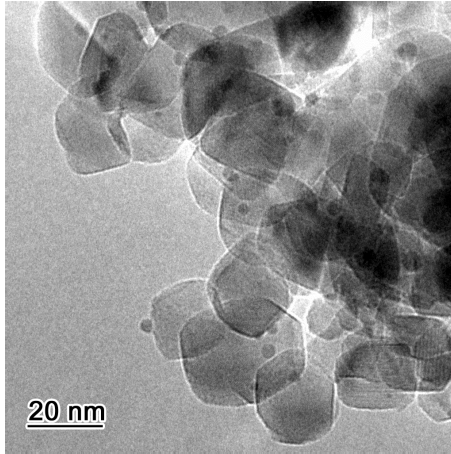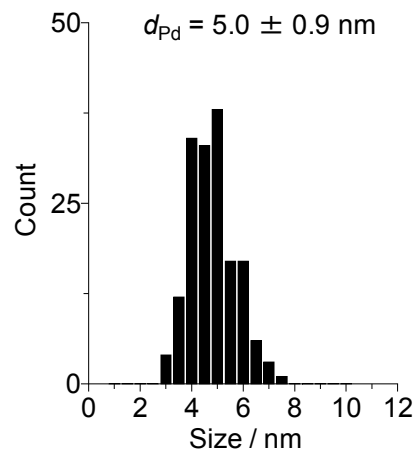

**Pd<sub>4</sub>/TiO<sub>2</sub>**

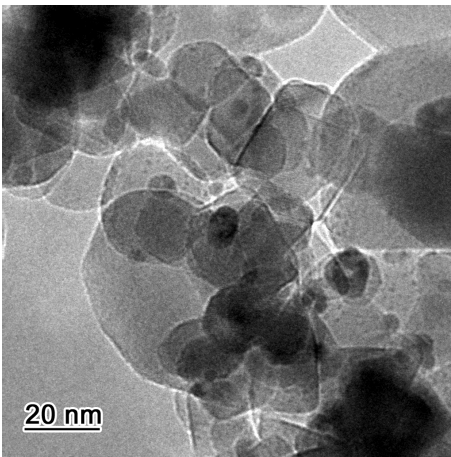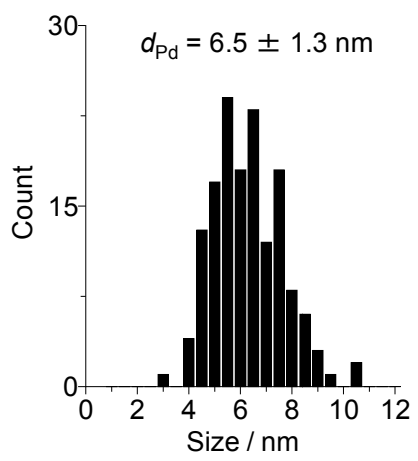

**Au<sub>2</sub>/TiO<sub>2</sub>**

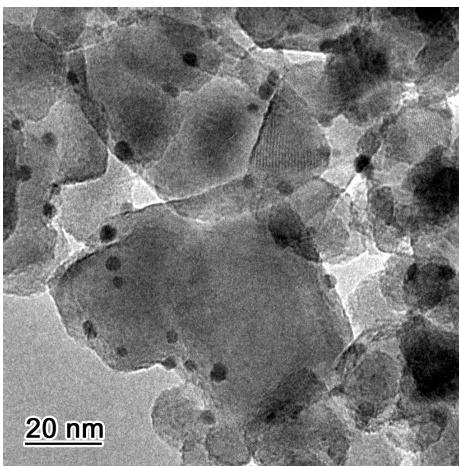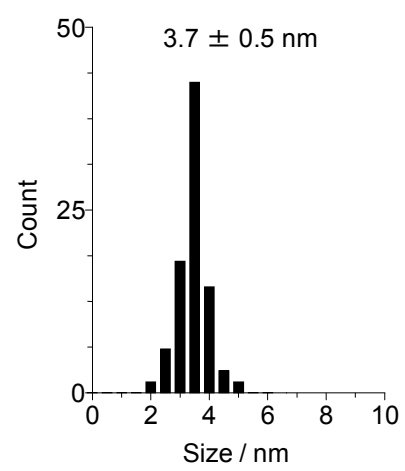

Pt<sub>2</sub>/TiO<sub>2</sub>

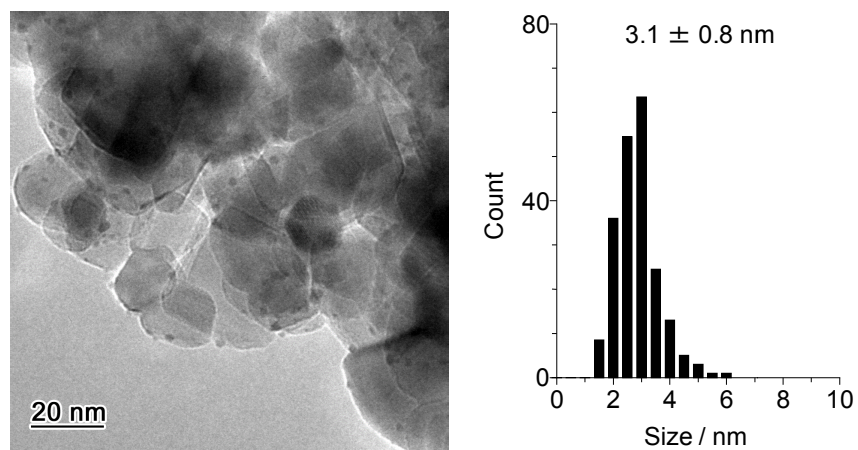

Fig. S1 TEM images and size distribution of Pd particles on the catalysts.

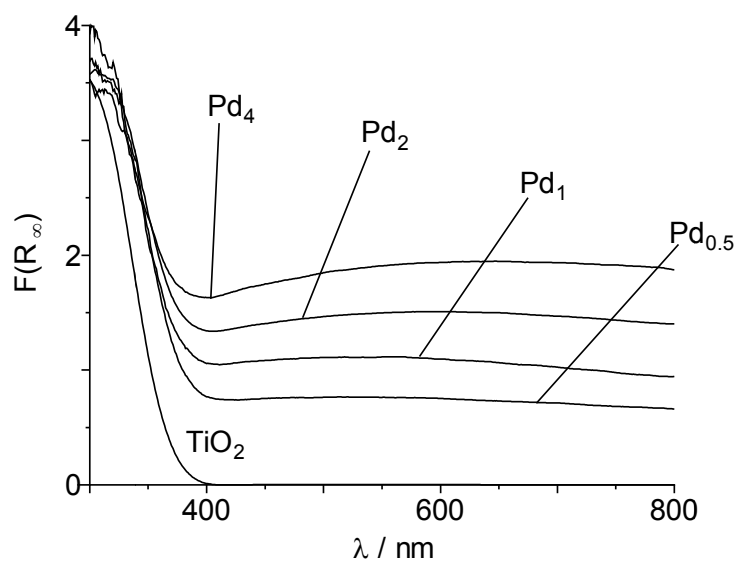

Fig. S2 Diffuse-reflectance UV-vis spectra of Pd<sub>x</sub>/TiO<sub>2</sub> catalysts

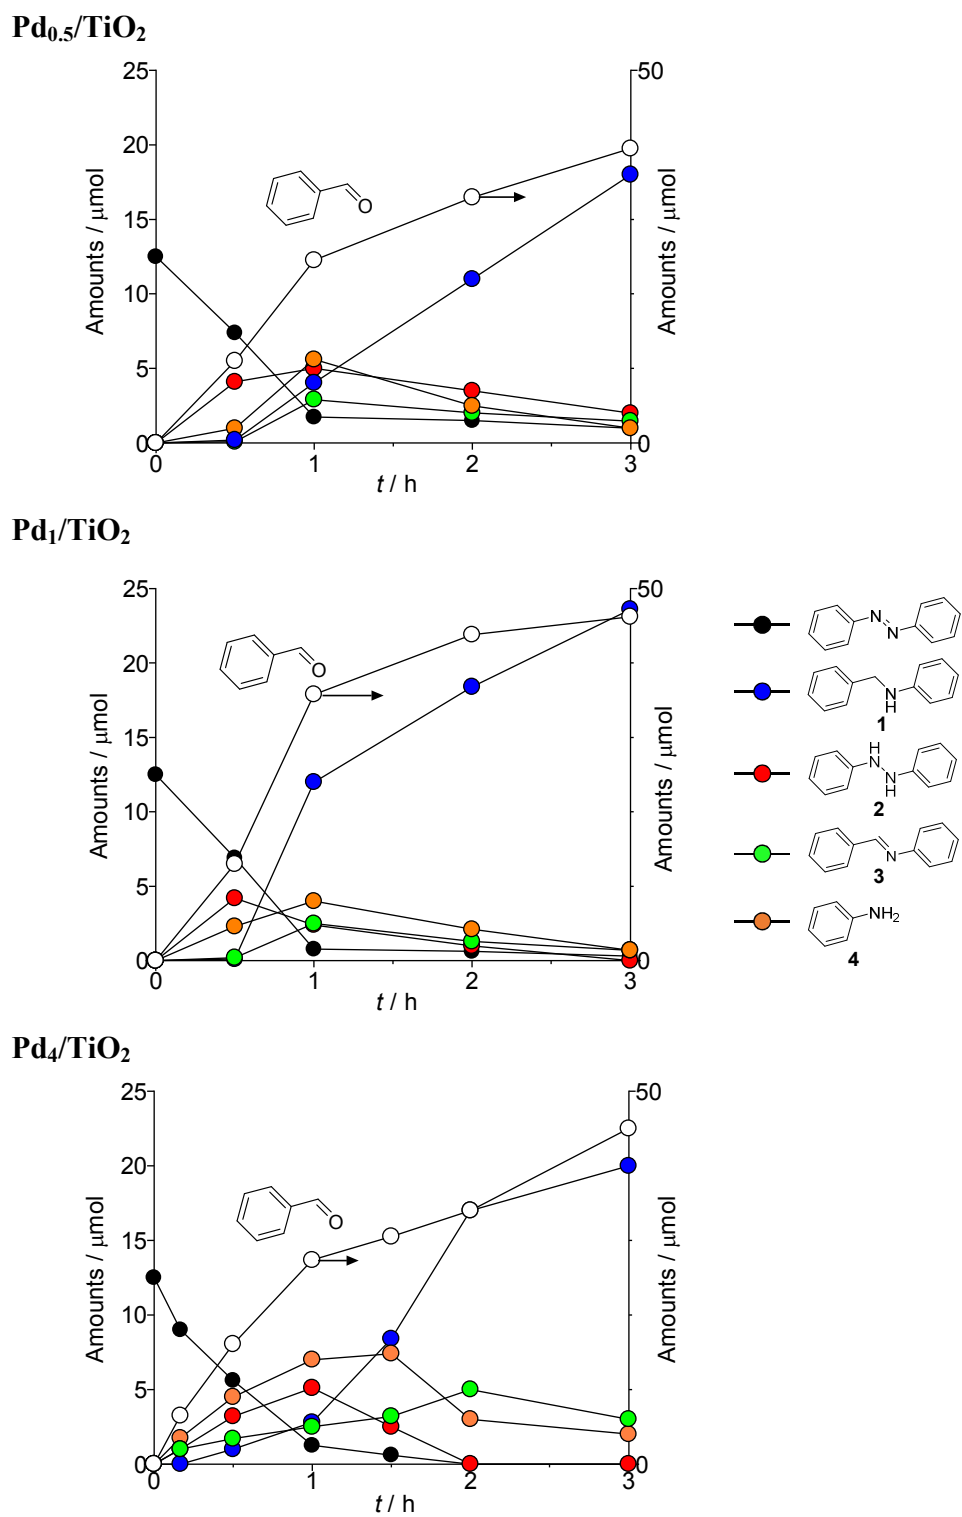

**Fig. S3** Time-dependent change in the amounts of substrate and products during photoreaction of benzyl alcohol and azobenzene on the respective catalysts.
